# Supplementary material for: Respiratory syncytial virus disease morbidity in Australian infants aged 0 to 6 months: a systematic review with narrative synthesis
Source: BMC Public Health. 2023 Dec 21;23:2560. doi: 10.1186/s12889-023-17474-x (PMC10740277; doi:10.1186/s12889-023-17474-x)
Supplement: Supplementary file 3 — Additional File 3: Standardised data extraction questionnaire for eligible studies included in review [file 12889_2023_17474_MOESM3_ESM.xlsx]

## Sheet: Sheet 1
													Additional File 3. Standardised data extraction questionnaire for eligible studies included in review
													Year of Publication	Authors	Journal	Title	Study Design	Aims / Objectives	Study Period: From	Study Period: To	Region	Setting	Age	Sample Size	Clinical Diagnosis	Laboratory Diagnosis	Diagnostic Method	Outcomes Measured	Findings
													2020	Moore, Hannah C.; Lim, Faye J.; Fathima, Parveen; Barnes, Rosanne; Smith, David W.; de Klerk, Nicholas; Blyth, Christopher C.	The Journal of infectious diseases	Assessing the Burden of Laboratory-Confirmed Respiratory Syncytial Virus Infection in a Population Cohort of Australian Children Through Record Linkage.	Retrospective cohort study	Describe age-specific epidemiology of RSV infections, including clinical severity and outcomes	2000-01-01	2012-12-31	Western Australia	Community, ED, general hospital ward, ICU	0-16 years. Grouped according to age: < 3 months, 3-5 months, 6-23 months, 2-4 years, 5-16 years. Subdivided population by Indigenous and non-Indigenous status. Did not distinguish between infants with and without comorbidities. Includes both healthy and high-risk infants in the cohort.	45 699 children tested for RSV at least once during 2000-2012.	ICD-10-AM diagnosis of bronchiolitis, pneumonia, influenza, pertussis, croup, upper respiratory tract infection, asthma were considered. If no ICD-10-AM diagnosis code was available, symptom codes, discharge text, presenting symptom text or major diagnostic category were used to confirm clinical diagnosis.	Yes	Immunofluorescence antigen detection, viral culture, polymerase chain reaction	Age-specific RSV positivity rates (per 1000 child-years)	Overall positivity rates were highest in children aged < 3 months (31 per 1000 child-years, 95% CI 30.2-32.5), and second highest in children aged 3-5 months (21 per 1000 child-years). This is compared to between 02 and 7.9 per 1000 child-years in children aged 6 months to 16 years). RSV positivity rates in children requiring hospitalisation were highest in children aged < 3 months (28 per 1000 c…
													2019	Homaira, Nusrat; Briggs, Nancy; Oei, Ju-Lee; Hilder, Lisa; Bajuk, Barbara; Jaffe, Adam; Omer, Saad B.	Journal of Infectious Diseases	Association of Age at First Severe Respiratory Syncytial Virus Disease With Subsequent Risk of Severe Asthma: A Population-Based Cohort Study	Retrospective cohort study	Investigate an association between hospitalised RSV between 0-2 years old and risk of subsequent asthma	2001-01-01	2011-12-31	New South Wales	General hospital ward, ICU	0-24 months Grouped according to age: < 3 months, 3 to < 6 months of age	888 154 children born during study period (2001-2010). 18 402 children (2.0%) had ≥1 hospitalization for RSV disease within the first 2 years of life and were included in analyses.	ICD-AM-10 diagnostic codes were used to identify hospitalizations for RSV disease. Any hospitalizations with RSV-specific codes, including RSV pneumonia (J12.1), acute RSV bronchitis (J20.5), acute RSV bronchiolitis (J21.0), and RSV organism (B97.4), in either the principal or other diagnosis fields were considered as hospitalizations for RSV disease.	Yes	Not specified. RSV diagnostic codes according to ICD-10-AM, requires laboratory confirmation of RSV but not known the specific diagnostic method used.	Age distribution of RSV hospitalisations; Age-specific asthma hospitalisation incidence rate (per 1000 child-years)	Of the 18 042 children, 34% were hospitalised for RSV in the first 3 months of life, and 57% (10 268) were hospitalized for RSV disease within the first 6 months of life. Incidence of asthma-associated hospitalisation per 1000 child-years among children hospitalised with RSV disease was 0.5 for infants < 3 months of age (95% CI 0.2-0.7), 0.9 for infants 3 to < 6 months of age (95% CI 0.5-1.3). Th…
													2022	Gebremedhin, Amanuel Tesfay; Hogan, Alexandra B.; Blyth, Christopher C.; Glass, Kathryn; Moore, Hannah C.	Scientific reports	Developing a prediction model to estimate the true burden of respiratory syncytial virus (RSV) in hospitalised children in Western Australia.	Retrospective cohort study	Describe rate of RSV positivity in hospitalised children, develop model to estimate the true incidence of RSV hospitalisations	2000-01-01	2012-12-31	Western Australia	General hospital ward, ICU	0-5 years Grouped according to age: <3 months, 3-<6 months, 6-<12 months, 12-<24 months, 24-<36 months, 36-<60 months	321,825 children (birth cohort). 33,983 hospitalisations with RSV testing records. 8604 episodes of RSV requiring hospitalisation.	ICD-10-AM diagnosis codes for bronchiolitis, pneumonia, unspecified ALRI, influenza, pertussis, bronchitis, upper respiratory tract infection, asthma were considered.	Yes	Immunofluorescence antigen detection, viral culture, polymerase chain reaction on respiratory specimens, complement-fixation tests on serum	Age distribution of RSV testing, positivity, and hospitalisation; Age-specific RSV hospitalisation incidence rate and predicted rate (per 1000 child-years)	Of those tested for RSV, 22.4% were aged < 3 months and 35.8% were age < 6 months. Of those who were positive for RSV, 31% were age < 3 months, 32% 3-6 months and 63% 0-6 months. Of those hospitalised with RSV, 30% were age < 3 months, 48.9% were < 6 months. One in three hospital admissions for RSV were in infants < 3 months of age (30%). From the birth cohort of 321,825 hospitalised children und…
													2019	Moore, Hannah C.; de Klerk, Nicholas; Richmond, Peter C.; Fathima, Parveen; Xu, Ruomei; Keil, Anthony D.; Snelling, Thomas L.; Strunk, Tobias	The Journal of pediatrics	Effectiveness of Palivizumab against Respiratory Syncytial Virus: Cohort and Case Series Analysis.	Retrospective cohort study, case series analysis	Estimate effectiveness of palivizumab for preventing RSV infections in infants admitted to the NICU at birth	2002-01-01	2013-12-31	Western Australia	Community, general hospital ward, ICU	0-2 years Grouped according to age: <6 months, <12 months Includes pre-term, LBW, CHD, CLD infants	24 329 infants as the cohort for analysis (ex-NICU infants). 1506 RSV detections.	Not specified.	Yes	Immunofluorescence antigen detection, polymerase chain reaction	Age distribution of RSV infections	1506 RSV detections before 2 years of age. The majority (52.1%) of RSV infections were in infants aged < 6 months. Data regarding effectiveness of palivizumab for preventing RSV infections in infants admitted to the NICU at birth does not hold any relevance to this systematic review.
													2021	Anderson, J.; Oeum, M.; Verkolf, E.; Licciardi, P. V.; Mulholland, K.; Nguyen, C.; Chow, K.; Waller, G.; Costa, A. M.; Daley, A.; Crawford, N. W.; Babl, F. E.; Duke, T.; Do, L. A. H.; Wurzel, D.	Archives of Disease in Childhood	Factors associated with severe respiratory syncytial virus disease in hospitalised children: a retrospective analysis	Retrospective cohort study	Describe clinical, laboratory, demographic characteristics of children hospitalised with RSV to identify factors associated with severity	2017-05-01	2019-12-31	Victoria	General hospital ward, ICU	0-2 years. Multivariate analysis factors associated with severe RSV disease, included variable of age < 2 months.	1250 children under the age of 2 years were diagnosed with RSV infection. 970 (78%) of these patients were hospitalised.	Clinical diagnosis accompanying PCR positive RSV result. Severity of disease defined according to level of respiratory support required. Severe disease defined as requirement for HFNP, CPAP, BiPAP or mechanical ventilation. Moderate disease defined as requiring low flow oxygen supplementation or no respiratory support requirement.	Yes	Reverse transcription polymerase chain reaction from nasal swabs.	Predictors of severity (level of respiratory support required, HFNP, CPAP, BiPAP or mechanical ventilation)	1250 RSV detections in children < 2 years of age. Of these 970 (78%) required hospitalisation. Age < 2 months was an independent predictor of severe RSV disease (OR 2.3, 95% CI 1.6-3.3). Infants aged < 2 months were significantly more likely to require HFNP, CPAP, BiPAP or mechanical ventilation.
													2016	Homaira, N.; Oei, J.-L.; Mallitt, K.-A.; Abdel-Latif, M. E.; Hilder, L.; Bajuk, B.; Lui, K.; Ferson, M.; Nurkic, A.; Chambers, G. M.; Rawlinson, W.; Snelling, T.; Jaffe, A.	Epidemiology and infection	High burden of RSV hospitalization in very young children: a data linkage study.	Retrospective cohort study	Provide population-based age-specific rates of severe RSV illness in children, comparing Indigenous status and those with and without risk factors	2001-01-01	2010-12-31	New South Wales	General hospital ward, ICU	0-5 years. Grouped according to age: 0–3 months, 4–6 months, 7–11 months, 12–24 months, 2–<5 years. Subdivided popualtion by prior risk factors (pre-term, low birth weight, bronchopulmonary dysplasia), and by Indigenous status.	870 314 children born (birth cohort). 68 913 new episodes of ALRI hospitalization. Of 68 913 new episodes of ALRI hospitalization, 16 119 (23%) were coded as RSV.	ICD-10-AM diagnosis codes for RSV bronchiolitis, bronchitis, pneumonia, unspecified ALRI, influenza, pertussis.	Yes	Not specified. Primary RSV diagnostic codes according to ICD-10-AM, requires laboratory confirmation of RSV but not known the specific diagnostic method used. Confirmed with medical record coders at RPAH hospital that RSV codes require RSV laboratory confirmation.	Age distribution of RSV hospitalisations; Age-specific RSV hospitalisation incidence rate (per 1000 child-years) in children with and without risk factors (BPD, pre-term, LBW)	In this birth cohort, 35·5% (5720/16 119) of all RSV hospitalizations occurred in children aged 0–3 months, 24·0% (3836/16 119) in children aged 4–6 months, 59.5% in age 0-6 months, 24·0% (3809/16 119) in children aged 7–11 months, 13·0% (2133/16 119) in children aged 12–24 months and 3·0% (518/16 119) in children aged 2–<5 years. In healthy children with no risk factors, incidence of RSV hospita…
													2017	Lim, Faye J.; Blyth, Christopher C.; Fathima, Parveen; de Klerk, Nicholas; Moore, Hannah C.	Influenza and other respiratory viruses	Record linkage study of the pathogen-specific burden of respiratory viruses in children.	Retrospective cohort study	Describe the pathogen-specific burden and age-specific rates of respiratory viruses in a cohort of hospitalised children	2000-01-01	2012-12-31	Western Australia	General hospital ward, ICU	0-16 years. Grouped according to age: <1 month, 1-5 months, 6-23 months, 2-4 years, 5-9 years, 10-16 years.	469,589 children born (birth cohort). 213 365 hospitalised (any reason). 30,859 children with RSV testing record. 8769 RSV positive.	Diasnoses of ALRI, URTI. ICD-10-AM diagnosis codes for ALRI included pneumonia, bronchiolitis, influenza, unspecified ALRI, bronchitis or whooping cough. ICD-10-AM diagnosis codes for URTI included otitis media and sinusitis.	Yes	Immunofluorescence antigen detection, viral culture and serology, polymerase chain reaction	Age-specific hospitalisation incidence rate (per 100,000 child-years)	Incidence rates for RSV requiring hospitalisation were higher than all other respiratory viruses tested (influenza, parainfluenza, rhinovirus, adenovirus, picornavirus, hMPV). Incidence rates for RSV hospitalisation were highest in <1 month and 1-5 month age groups, compared to 6-23 month and 2-4 years. Incidence rate for < 1 month olds was ~2100 per 100,000 child years and for 1-5 months was ~24…
													2010	Dede, Apakasiamaka; Isaacs, David; Torzillo, Paul J.; Wakerman, John; Roseby, Rob; Fahy, Rose; Clothier, Tors; White, Andrew; Kitto, Paula	Journal of paediatrics and child health	Respiratory syncytial virus infections in Central Australia.	Retrospective case series	Describe seasonality of RSV infection in a desert region, compare age-specific RSV hospitalisation rate	2000-01-01	2004-12-31	Alice Springs, Northern Territory	General hospital ward	< 2 years. Grouped according to age: <1 month, <3 months, <6 months, <12 months, <2 years. Subdivided by Indigneous and non-Indigenous.	173 children with RSV hospitalisation. 165 had community-acquired RSV infection and 8 had nosocomial RSV infections.	Clinical diagnosis of bronchiolitis.	Yes	Direct Immunofluorescence antigen testing (PCR and viral culture NOT performed).	Age distribution of RSV hospitalisations	The age distribution of RSV hospitalisations was skewed towards younger children with 11.6% were in infants aged <1 month old, 29.5% in <3 months, 52.6% <6 months old. One hundred and twenty-two (74%) of the children with RSV infection were Aboriginal. The annual rate of RSV infection in hospitalised Aboriginal children <2 years old was 29.6 per 1000, which is significantly greater than the rate …
													2019	Saravanos, Gemma L.; Sheel, Meru; Homaira, Nusrat; Dey, Aditi; Brown, Edward; Wang, Han; Macartney, Kristine; Wood, Nicholas J.	The Medical journal of Australia	Respiratory syncytial virus-associated hospitalisations in Australia, 2006-2015.	Retrospective cohort study	Estimate the age-specific rates of RSV-associated hospitalisation to identify groups at risk of serious RSV disease	2006-01-01	2015-12-31	Australia	General hospital ward, ICU	0-65+ years (all ages). Grouped according to age: 0-2 months, 3-5 months, 6-11 months, 12-23 months, 24-59 months, 5-14 years, 15-24 years, 25-34 years, 35-44 years, 45-54 years, 55-64 years, > and = 65 years, and also < 6 months, < 5 years. Also subdivided population by Indigenous and non-Indigenous.	86 687 RSV hospitalisations.	ICD-10-AM diagnosis codes for RSV pneumonia, RSV bronchitis , RSV bronchiolitis, and RSV as the cause of diseases classified to other chapters (RSV organism) (B97.4) and unspecified acute bronchiolitis (J21.9).	Yes	Unknown	Age-specific RSV hospitalisation rates (per 100,000 population) compare Indigenous and non-Indigenous; RSV hospitalisation risk	The highest RSV-associated hospitalisation incidence rate was in infants aged 0-2 months (3129 per 100,000 population), and second highest in infants aged < 6 months (2468 per 100,000 population). RSV-associated hospitalisation rate is 1806 per 100,000 in infants 3-5 months of age. The numbers of RSV hospitalisations of children under 5 years of age peaked at one month of age, then declined with …
													2022	Saravanos, Gemma L.; Hu, Nan; Homaira, Nusrat; Muscatello, David J.; Jaffe, Adam; Bartlett, Adam W.; Wood, Nicholas J.; Rawlinson, William; Kesson, Alison; Lingam, Raghu; Britton, Philip N.	Pediatrics	RSV Epidemiology in Australia Before and During COVID-19.	Ecological study	Characterise the magnitude, severity and age-related changes of the shifted RSV epidemic during the COVID pandemic compared to pre-pandemic	2014-01-01	2020-12-31	New South Wales	Community, ED, General hospital ward, ICU	0-16 years. Grouped according to age: 0-5 months, 6-11 months, 12-23 months, 2-4 years, 5-15 years.	22 997 RSV detections.	ICD-10-AM diagnosis codes for RSV pneumonia, RSV bronchitis , RSV bronchiolitis, RSV as the cause of disease classifed to other codes, unspecified acute bronchiolitis, RSV or unspecified acute respiratory illness (ARI) code (asthma, acute upper respiratory infection, acute lower respiratory infection, bronchiolitis, cough, pneumonia, and wheezing).	Yes	Polymerase chain reaction	Age distribution of RSV infections, hospitalisations, ICU admissions (annual average count); RSV test positivity	Laboratory confirmed RSV infections for 2014-2019 (pre-SARS-CoV-2) were highest in 0-5 month age group (annual average count of 453, SD 43.15), compared with all other age groups in children up to 15 years of age. This trend continued in 2020 and persisted despite the restrictions imposed by the SARS-CoV-2 pandemic. RSV hospitalisations for 2014-2019 (pre-SARS-CoV-2) were highest in 0-5 month age…
													2017	Fagan, Peter; McLeod, Charlie; Baird, Robert W.	Journal of paediatrics and child health	Seasonal variability of respiratory syncytial virus infection in the Top End of the Northern Territory (2012-2014).	Retrospective audit	Determine age-specific prevalence of RSV in the NT, investigate the demographics and drivers of seasonality	2012-01-01	2014-08-31	Top End, Northern Territory (Darwin, Katherine, Gove)	Community, ED, General hospital ward, ICU	All ages (0-60+ years) Grouped according to age: <6 months, 6-12 months, >1-2 years, >2-3 years, >3-4 years, >4-5 years, >5-30 years, >30-60 years, >60 years. Also subdivided populatio by Indigenous and non-Indigenous.	4305 clinical samples tested for RSV. 272 (6.3%) RSV positive.	Not specified.	Yes	Polymerase chain reaction	Age distribution of RSV infections	Rate of RSV detection is highest in <6 month age group (32% of all RSV detections were in this age group). There was a higher burden of RSV disease in Indigenous infants < 6 months of age (36.2% of all RSV detections in Indigenous people), compared to non-Indigenous infants <6 months of age (26.8% of all RSV detections in non-indigenous people). This did not equate to a statistically significant …
													2019	Butler, Jessica; Gunnarsson, Ronny; Traves, Aileen; Marshall, Helen	The Pediatric infectious disease journal	Severe Respiratory Syncytial Virus Infection in Hospitalized Children Less Than 3 Years of Age in a Temperate and Tropical Climate.	Retrospective cohort study	Determine factors associated with severe RSV disease in hospitalised children	2013-01-01	2014-12-31	South Australia, Queensland (Women’s and Children’s Hospital, Adelaide SA, and the Paediatric Department at Cairns Hospital, Cairns QLD)	General hospital ward, ICU	< 3 years. Examined younger age (<6 months) as an independent risk factor for severe hospitalised RSV. Population included children with risk factors for severe RSV (pre-term, socio-economic status, multiple comorbidities, Indigenous status).	496 RSV infections. 97 cases of severe RSV disease.	ICD-10-AM diagnosis codes for RSV pneumonia, RSV bronchitis, RSV bronchiolitis. Brisbane RSV Infection Severity Scoring system to classify RSV disease are mild, moderate or severe. Severe disease was defined as that requiring mechanical ventilation, needing NG/IV rehydration and hospital admission for > 5 days (this would require ICU admission).	Yes	Polymerase chain reaction	Age distribution of RSV hospitalisation; Predictors of severity (ICU/ HDU, need for NG/IV rehydration, hospital length of stay >5 days or < 5 days, no respiratory support, need for supplemental oxygen, need for mechanical ventilation)	The majority of RSV hospitalisations were in infants < 6 months of age (341 cases of 496 total, 68.8%). Age was found to be significantly negatively associated with RSV disease severity (OR 0.95; 95% CI 0.90–0.99, p=0.02). Decreasing age (in months) associated with an increased risk of severe disease. The median age for severe hospitalised RSV disease was 4.7 months with an IQR of 0.33-6.0 months.
													2020	H, Pham; J, Thompson; D, Wurzel; T, Duke	Journal of Paediatrics and Child Health	Ten years of severe respiratory syncytial virus infections in a tertiary paediatric intensive care unit	Descriptive case study	Describe epidemiology and treatment of RSV infection in a tertiary paediatric ICU	2005-03-01	2015-08-01	Melbourne, Victoria (Royal Children's Hospital Melbourne)	ICU	0-16 years. Grouped according to age: < 30 days, < 3 months, < 12 months, 12-59 months, 5-16 years.	604 RSV paediatric ICU hospitalisations. Excluded likely hospital-acquired RSV.	Clinical diagnosis based on presenting symptoms: LRTI, respiratory failure, apnoea, upper airway pathology (acute), neurological event (acute), sepsis, in-hospital arrest, out of hospital arrea, dysrythmia, hypovolaemic shock.	Yes	Direct immunofluorescence and polymerase chain reaction	Age distribution of ICU admissions	Examination of age-distribution indicated that 43% of RSV infections requiring ICU admission were in infants aged < 3 months, 6% were in infants < 30 days old. No other analyses were performed by age subgroups.
													2018	Fathima, Parveen; Blyth, Christopher C.; Lehmann, Deborah; Lim, Faye J.; Abdalla, Tasnim; de Klerk, Nicholas; Moore, Hannah C.	Clinical infectious diseases : an official publication of the Infectious Diseases Society of America	The Impact of Pneumococcal Vaccination on Bacterial and Viral Pneumonia in Western Australian Children: Record Linkage Cohort Study of 469589 Births, 1996-2012.	Retrospective cohort study	Assessed the impact of pneumococcal vaccination on all-cause and pathogen-specific pneumonia hospitalisations	2000-01-01	2012-12-31	Western Australia	General hospital ward, ICU	0-16 years. Grouped according to age: < 6 months, 6-11 months, 12-23 months, 2-4 years, 5-16 years. Subdivided population by Indigenous and non-Indigenous.	469 589 children born (birth cohort). 15 175 pneumonia hospitalisations. 1097 RSV positive.	ICD-10-AM pneumonia-related diagnostic codes.	Yes	Viral culture, polymerase chain reaction	Age-specific and pathogen-specific detection rates (per 100,000 child-years)	RSV was the most common pathogen identified as the cause of pneumonia-related hospital admissions across all age groups and in both Indigenous and non-Indigenous children, accounting for 34% of all pathogens identified. In Indigenous infants < 6 months of age, the rate of RSV detection in pneumonia hospitalisations was the highest of all virus and bacteria, and the rate of RSV detection was twice…
													2023	Nguyen, Edward; Saw, Chia; Morkos, Michael; Abass, Fuad; Foley, David; Bulsara, Max	Journal of paediatrics and child health	Unusual local epidemic of paediatric respiratory syncytial virus during a time of global pandemic.	Ecological study	To present the number, clinical presentation and severity of RSV-related admissions during a global pandemic.	2018-03-01	2021-02-01	Western Australia	General hospital ward	0-16 years. Grouped according to age: 0-1 month, 2-11 months, 12-23 months, 24-59 months, 5-12 years, >12 years.	294 RSV hospitalisations.	Clinical diagnosis of bronchiotis, lower respiratory tract infection, upper respiratory tract infection or viral-induced wheeze.	Yes	Polymerase chain reaction	Age-distribution of RSV hospitalisation; Severity of RSV infection (respiratory support)	There was a shift in age group proportions across the years. In 2018, 22.4% of RSV admissions were 0-1 months of age, 2019 there were 16.3% and 2020 there were 5.4%. The need for oxygen therapy was statistically significantly less in 2020 than in 2018. This is correlated to a marked difference in the distribution of age of patients in each study year, with 2020 having a lower proportion of patien…
													2012	Moore, Hannah C.; de Klerk, Nicholas; Keil, Anthony D.; Smith, David W.; Blyth, Christopher C.; Richmond, Peter; Lehmann, Deborah	Journal of paediatrics and child health	Use of data linkage to investigate the aetiology of acute lower respiratory infection hospitalisations in children.	Descriptive case study	To document the proportion of ALRI hospitalisations with positive identification of a respiratory pathogen	2000-01-01	2005-12-31	Western Australia	General hospital ward, ICU	0-9 years. Grouped according to age: < 6 months, 6-11 months, 12-23 months, 2-4 years, 5-9 years.	19,857 ALRI hospitalisations. 8980 ALRI hospitalisations with RSV testing record. 3226 RSV positive result. 1606 hospitalisations with RSV positive result in infants < 6 months.	ICD-10-AM diagnoses for bronchitis, bronchiolitis, influenza, pneumonia, whooping cough, unspecified ALRI.	Yes	Direct immunoflorescence, viral culture, polymerase chain reaction	Pathogen-specific cause of ALRI	For all ALRI admissions in infants aged 0 to 9 years, the most frequently identified respiratory pathogens were RSV (n = 3226). Overall in infants aged 0-9 years, RSV was identified more often in non-Aboriginal children than Aboriginal children hospitalised for ALRI (41.4% vs. 32.0%, P < 0.001). Hospital admissions for bronchiolitis in infants < 6 months, the most common respiratory pathogen iden…
													2013	Chappell, K. J.; Brealey, J. C.; Mackay, I. M.; Bletchly, C.; Hugenholtz, P.; Sloots, T. P.; Sly, P. D.; Young, P. R.	Journal of Medical Microbiology and Diagnosis	Respiratory syncytial virus infection is associated with increased bacterial load in the upper respiratory tract in young children. (Special Issue: Bacterial pathogenecity and epidemiology.)	Descriptive case study	To assess the diversity and prevalence of bacterial pathogens associated with viral infections of the respiratory tract in children.	2013-03-31	2013-05-15	Queensland	General hospital ward, ICU	0-5 years. Grouped according to age: 0-6 months, 6-12 months, 12-24 months, 24-60 months.	201 children presenting to hospital with respiratory symptoms during the winter months, tested for multiple viral and bacterial respiratory pathogens. 83 were aged 0-6 months. 29 were RSV positive.	Clinical diagnostic criteria not specified. Reported that children presenting to hopsital with symptoms of an "Acute Respiratory Infection".	Yes	Polymerase chain reaction	Pathogen-specific cause of ALRI	RSV was the most common virus identified among children aged 0-6 months presenting to hospital with respiratory symptoms during the winter months. In infants aged 0-6 months, RSV alone was detected in 31.3% of cases (mono-infection), and RSV in combination with another viral or bacterial pathogen was detected in 34.9% of cases (co-infection). When comparing with other age groups, RSV alone was le…
